# Supplementary material for: Retrophylogenomics in rorquals indicate large ancestral population sizes and a rapid radiation
Source: Mob DNA. 2019 Jan 21;10:5. doi: 10.1186/s13100-018-0143-2 (PMC6340175; doi:10.1186/s13100-018-0143-2)
Supplement: Supplementary file 1 — Table S1. List of samples with accession numbers and sequencing properties. Figure S1. Simulation results for CHR2 detection with MELT at varying depth of coverage using dataset specific parameters. Figure S2 Frequency of filters applied by MELT to exclude low-quality CHR2 calls. Figure S3 Phylogenetic trees of baleen whales reconstructed with CHR2 insertions. A) Dollo-Parsimony tree reconstructed in PAUP*. Asteriks indicate 100 % bootstrap support (500 replicates), lower bootstrap support is given as numbers. B) Bayesian inference tree with posterior probability given for nodes. Figure S4 Three alternative relationships in the rorqual radiation and the number of CHR2 insertion that support them. Figure S5 Phylogenetic tree of rorquals with frequency of heterozygous insertions per branch. Figure S6 CHR2 insertion rates per generation. Figure S7 Repeat landscapes of minke whale and bowhead whale based on available assemblies. (PDF 475 kb) [file 13100_2018_143_MOESM1_ESM.pdf]

# Retrophylogenomics in rorquals indicate large ancestral population sizes and rapid radiation

Supplementary Material

*Fritjof Lammers, Moritz Blumer, Cornelia Rücklé, Maria A. Nilsson*

## Supplementary Tables

Table S 1. List of samples with accession numbers and sequencing properties

| Species                | ID    | Accession-ID | Reference            | Insert Size | Coverage |
|------------------------|-------|--------------|----------------------|-------------|----------|
| NA right whale         | EgI0  | SRR5665640   | Arnason et al. 2018  | 470         | 10.69x   |
| Sei whale A            | Bbo01 | SRR5665645   | Arnason et al. 2018  | 482         | 10.36x   |
| Sei whale B            | Bbo02 | SRR5665646   | Arnason et al. 2018  | 482         | 10.27x   |
| Blue whale             | Bmu00 | SRR5665644   | Arnason et al. 2018  | 293         | 30.68x   |
| Humpback whale         | Mno00 | SRR5665639   | Arnason et al. 2018  | 470         | 27.88x   |
| Fin whale              | Bph03 | SRR5665643   | Arnason et al. 2018  | 294         | 13.99x   |
| Minke whale            | Bac00 | SRR896642    | Yim et. al 2014      | 472         | 7.73x    |
| Gray whale (eastern) A | Ero01 | SRR5665641   | Arnason et al. 2018  | 284         | 17.60x   |
| Gray whale (eastern) B | Ero02 | SRR5665642   | Arnason et al. 2018  | 284         | 22.29x   |
| Gray whale (western) A | Ero03 | SRR5495108   | DeWoody et. al. 2017 | 497         | 29.24x   |
| Gray whale (western) B | Ero04 | SRR5495104   | DeWoody et. al. 2017 | 471         | 26.65x   |

## Supplementary Figures

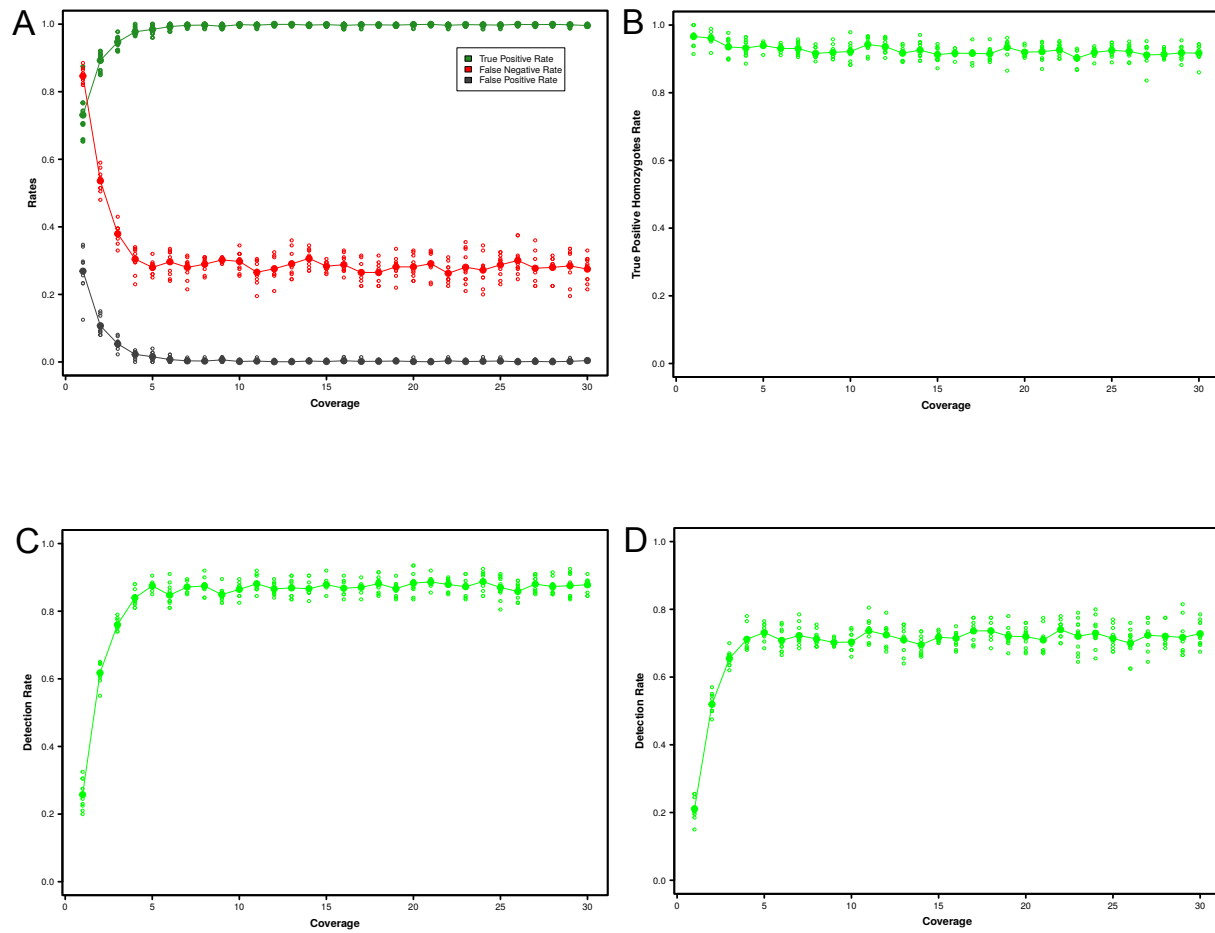

Figure S 1. Simulation results for CHR2 detection with MELT at varying depth of coverage using dataset specific parameters. A) Accuracy rates for detected CHR2 calls at varying coverages. B) Genotyping accuracy estimated from CHR2 insertions correctly called homozygous. C) MELT detection rate for the unfiltered and D) filtered datasets using MELT's internal filtering.

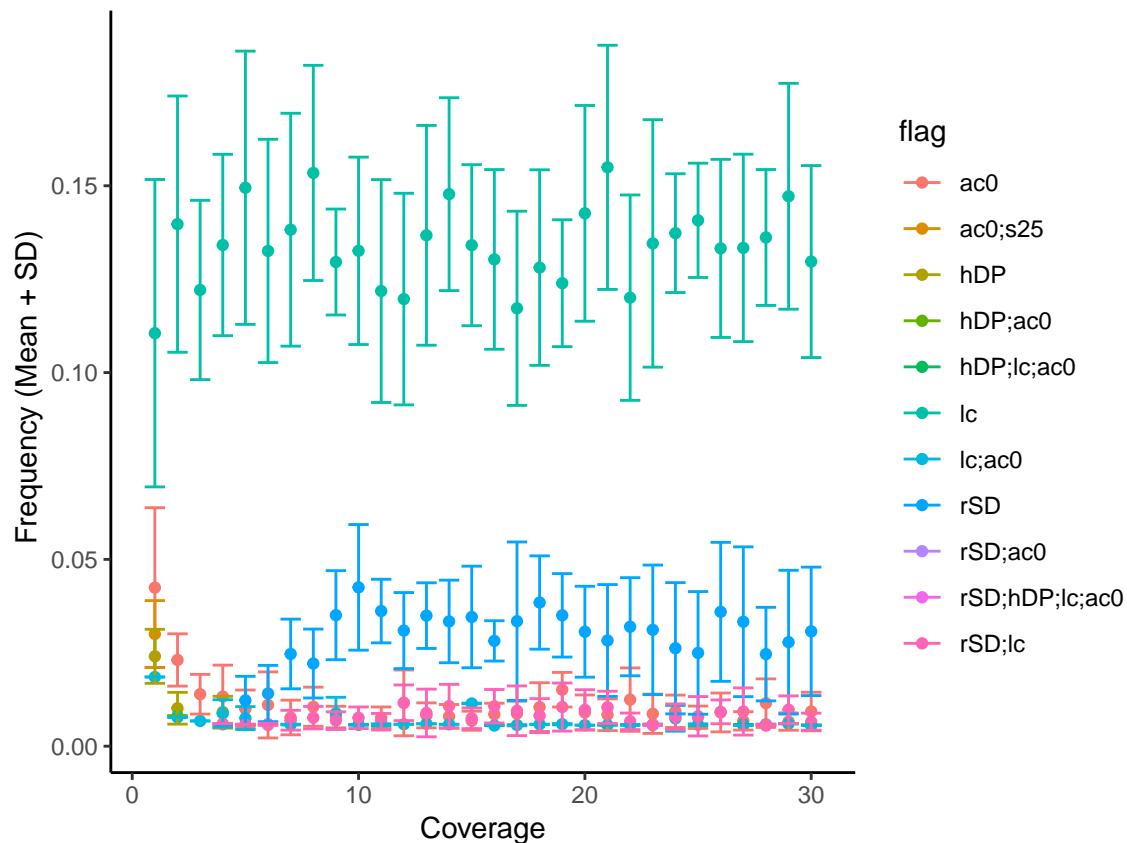

Figure S 2. Frequency of filters applied by MELT to exclude low-quality CHR2 calls. Most calls were excluded for proximity to low-complexity regions (lc). The other filter flags indicate sites without genotyped allele (ac0), sites that are not called in at least 25% of individuals (s25), sites with a high degree of discordant read pair evidence (hDP) and sites having unbalanced evidence on the 5' and 3' flanks of the insertion site (rSD). The description of filter flags are according to the MELT Documentation (<http://melt.igs.umaryland.edu/manual.php>).

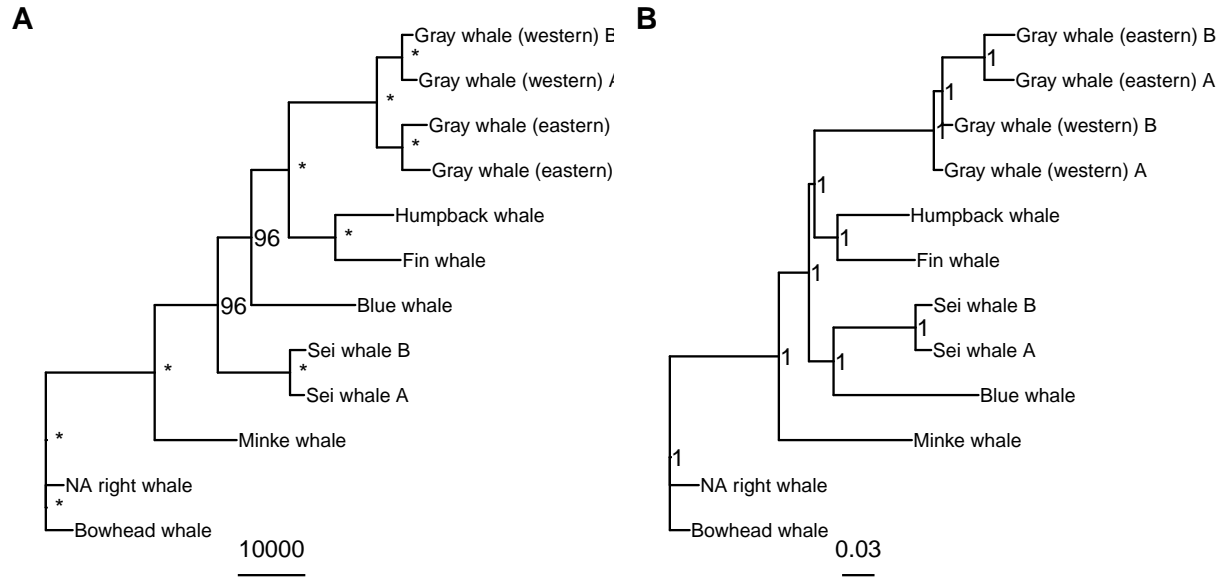

Figure S 3. Phylogenetic trees of baleen whales reconstructed with CHR2 insertions. A) Dollo-Parsimony tree reconstructed in PAUP\*. Asteriks indicate 100 % bootstrap support (500 replicates), lower bootstrap support is given as numbers. B) Bayesian inference tree with posterior probability given for nodes.

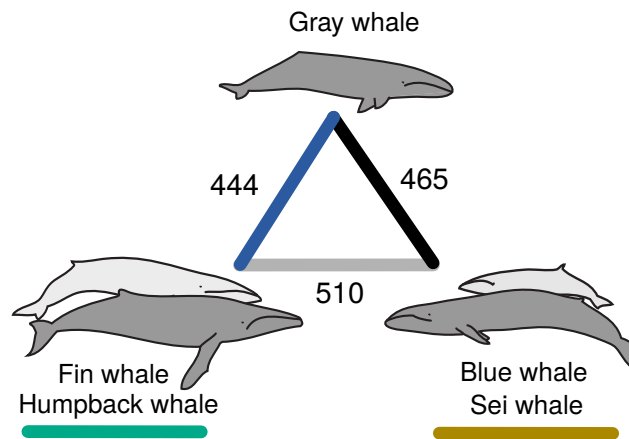

Figure S 4. Three alternative relationships in the rorqual radiation and the number of CHR2 insertion that support them. The KKSC test marginally rejects polytomy at  $p=0.02$  (bifurcation test). The colors represent the edges in the network and signal quantification in Figure 2.

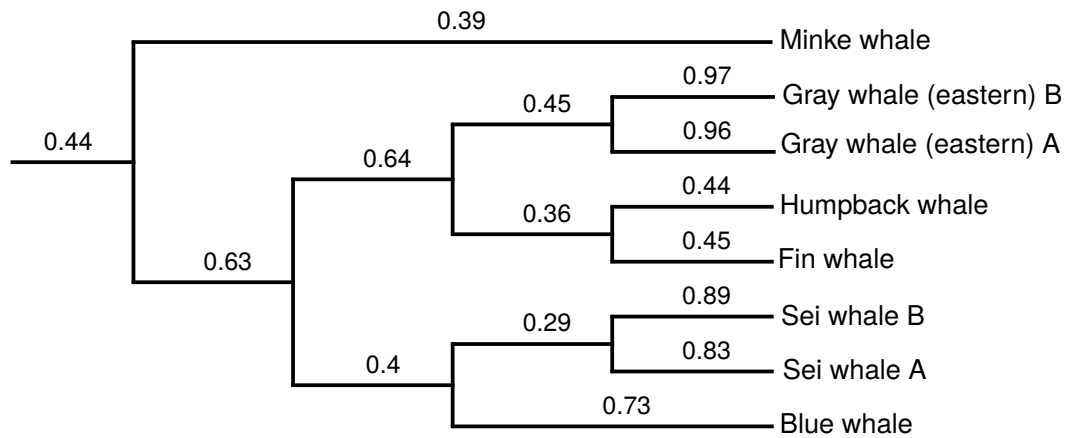

Figure S 5. Phylogenetic tree of rorquals with frequency of heterozygous insertions per branch. Heterozygous insertion frequency are calculated among extant species and mapped to the branches. Gray whale heterozygosity rates were calculated for each population (eastern and western Pacific).

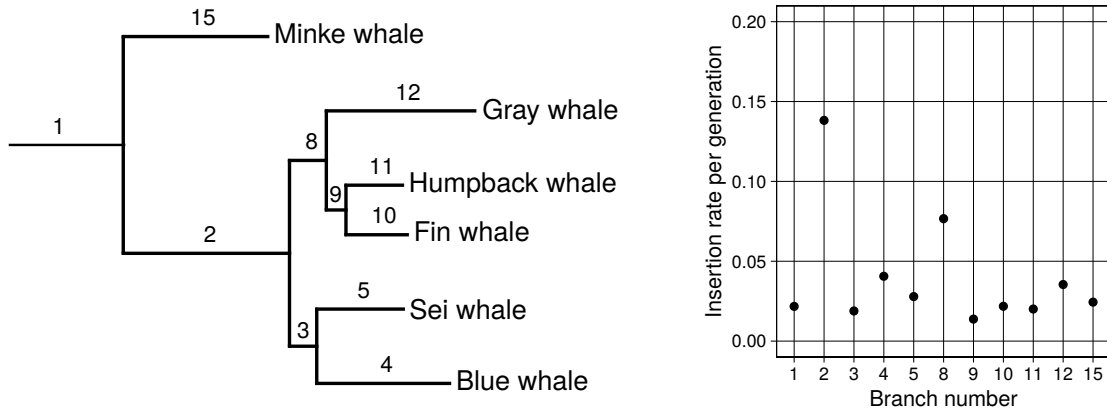

Figure S 6. CHR2 insertion rates per generation. Divergence times are taken from reference no. 10. The average insertion rate of baleen whales was calculated to be 24.4 years.

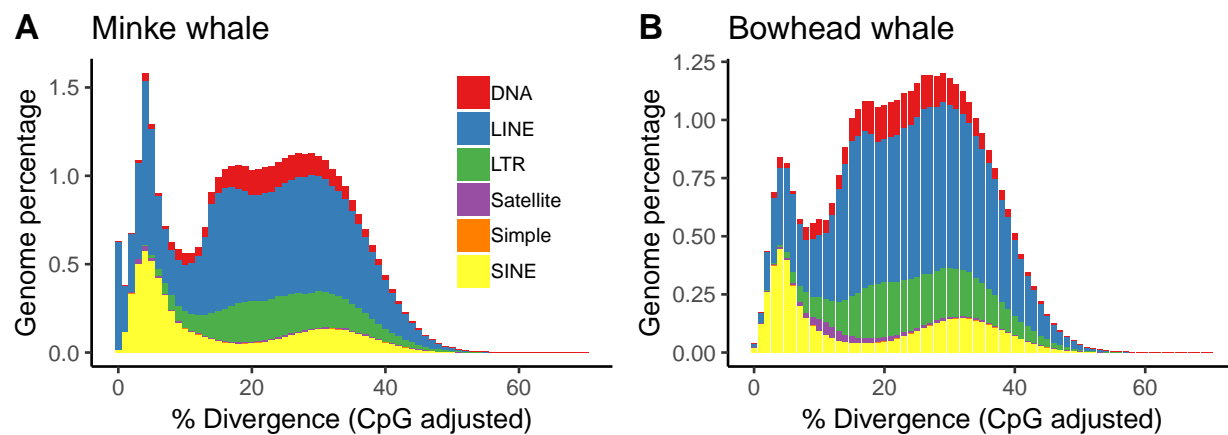

Figure S 7. Repeat landscapes of minke whale and bowhead whale based on available assemblies. The diagrams show the genome percent of the major repeat types depending on how much they have diverged from the consensus sequences.
