# Supplementary material for: Retrophylogenomics in rorquals indicate large ancestral population sizes and a rapid radiation
Source: Mob DNA. 2019 Jan 21;10:5. doi: 10.1186/s13100-018-0143-2 (PMC6340175; doi:10.1186/s13100-018-0143-2)
Supplement: Supplementary file 2 — Data S1: VCF file with filtered CHR2 variants in baleen whales called by MELT. (ZIP 10547 kb) [file 13100_2018_143_MOESM2_ESM.zip]

Archive with 1 entries (1 files):
- CHR2.final_comp.filter.vcf.gz
