# Supplementary material for: Retrophylogenomics in rorquals indicate large ancestral population sizes and a rapid radiation
Source: Mob DNA. 2019 Jan 21;10:5. doi: 10.1186/s13100-018-0143-2 (PMC6340175; doi:10.1186/s13100-018-0143-2)
Supplement: Supplementary file 3 — Data S2: NEXUS file with the presence-absence matrix of CHR2 insertions in baleen whales encoded as 1 (presence) and 0 (absence). (ZIP 159 kb) [file 13100_2018_143_MOESM3_ESM.zip]

Archive with 1 entries (1 files):
- CHR2_final.filtered.nexus
